# Supplementary material for: Severe Insulin Resistance and Intrauterine Growth Deficiency Associated With Haploinsufficiency for INSR and CHN2: New Insights Into Synergistic Pathways Involved in Growth and Metabolism
Source: PubMed Central journal article supplement — Diabetes. 2009 Aug 31;58(12):2954–61. doi: 10.2337/db09-0787 (PMC2780873; doi:10.2337/db09-0787), 2009-08-31
Supplement: supp_db09-0787_db09-0787_Online_Appendix.pdf [file supp_db09-0787_db09-0787_Online_Appendix.pdf]

## Online Supplementary Methods

### Suliman et al

**Table 1: Details for the proband's insulin requirement and diabetes control**

| <b>Treatment and glycaemic control- Proband</b> |                                                | <b>HbA1c</b><br>(normal range HbA1C 4.4-6.4%) |
|-------------------------------------------------|------------------------------------------------|-----------------------------------------------|
| Initially                                       | Actrapid 12/15/12/-                            |                                               |
| 1 year later                                    | Actrapid 18/22/14/-<br>Insulatard - / - / - /8 | HbA1c 6.4%                                    |
| During pregnancy                                | Actrapid 6/6/6/-<br>Insulatard - / - / - /9    | HbA1C 8.3%                                    |
| Post-partum                                     | no insulin required for 2 months               | HbA1C 4.8 %                                   |
| Current                                         | Actrapid 4/4/4/-<br>Insulatard - / - / - /-    | HbA1C 5.9 %                                   |

The proband was initiated on insulin therapy for diabetes from the age of 15 years. She has required variable insulin dosage. Notably, requiring less insulin throughout pregnancy and dietary treatment alone for 2 months post-natally and she is currently managed with gradually increasing insulin doses.

The substantial reduction in insulin requirement is at least in part due to the fact that the proband was initially diagnosed with type 1 diabetes and accordingly treated with replacement dose insulin (1.24IU/Kg/day). This resulted in recurrent hypoglycaemia and her insulin dosage was accordingly gradually reduced. A likely compounding factor is increased insulin requirements peri-puberty [1, 2] which coincided with the time of the probands diagnosis with diabetes.

Because of the pre-prandial hypoglycemia and postprandial hyperglycemia after delivery, low doses of short acting analogue are administrated, achieving good glycaemic control with HbA1c 5.9 % (DCCT).

#### **FISH analysis**

FISH was performed on patient metaphase chromosomes using labeled BACs and fosmids covering the entire genomic sequence and known promoters of genes within the break point regions. Probes were

selected using the University of California Santa Cruz (UCSC) genome browser (<http://genome.ucsc.edu/>) and obtained from the Children's Hospital Oakland Research Institute (CHORI) (<http://bacpac.chori.org/>).

Chromosome paints were used as per manufacturer's instructions. Labeled probes and chromosome paint were added onto slides of patient metaphase arrested chromosomes and incubated overnight to hybridise. Following hybridisation, the slides were washed and a secondary antibody added. Hybridisation efficiencies were >90%. Slides were mounted with Vectashield containing DAPI for chromosome counterstaining. A minimum of 20 metaphase spreads were analyzed by microscopy for each hybridisation experiment.

### Gene dosage investigations

Multiplex Ligation-dependent Probe Amplification (MLPA) reactions were carried out according to the manufacturer's instructions using the EK1 reagent kit (MRC-Holland, Amsterdam, The Netherlands). Synthetic probes for *INSR* exons 11-17 (details available on request) and a set of previously described control probes were used at a concentration of 1.33 fmol/μl [3] and data analyzed as previously described [4]. SYBR green analysis was used to quantify *CHN2* gene dosage. To calculate dosage of *CHN2* exons 5-10 we used the absolute Blue QPCR SYBR green *ROX mix* (Thermo Scientific, UK) with oligonucleotides designed to *CHN2* exons 5-10 and GCK exon 1 (normal control). Real time PCR was carried out on the ABI 9700 and dosage quotients were calculated from average crossing points of triplicate samples, using the comparative Ct ( $\Delta\Delta Ct$ ) method (3).

**Table 2: Genomic *INSR* sequencing-primers**

| INSR fragment  | Primer sequence        |
|----------------|------------------------|
| INSR_Exon 1- F | gtatttgtagctggcgaagc   |
| INSR_Exon 1- R | cttgggtggggtcctctc     |
| INSR_Exon 2- F | cccctgatcctctgatgc     |
| INSR_Exon 2- R | gaacaaggcagcagacactg   |
| INSR_Exon 3- F | gcatatgcagacaggaattgg  |
| INSR_Exon 3- R | agttttaacaagcgcatcg    |
| INSR_Exon 4- F | ccctccccttctcttctc     |
| INSR_Exon 4- R | cagctcagaggacatggag    |
| INSR_Exon 5- F | caccatggagaatcatgagaag |
| INSR_Exon 5- R | atgctgggattacaggcatc   |
| INSR_Exon 6- F | aagatcaactccgagcatgg   |
| INSR_Exon 6- R | caccagtccatggaaaaacc   |
| INSR_Exon 7- F | cccaggcttggctctgaaac   |
| INSR_Exon 7- R | tggagcacaacgtagcaag    |
| INSR_Exon 8- F | actcccaggcctcatctg     |
| INSR_Exon 8- R | tacaacctcactgcatcagc   |
| INSR_Exon 9- F | ccagcttctttgcacactg    |

|                     |                              |
|---------------------|------------------------------|
| INSR_Exon 9- R      | caaagtgcacagacacacg          |
| INSR_Exon 10- F     | gtgggggtgtgtgtgtgtg          |
| INSR_Exon 10- R     | gacctccaccaacaccaag          |
| INSR_Exon 11- F     | gtggcctccaagtgtcagag         |
| INSR_Exon 11- R     | aagcatctgctctccagcac         |
| INSR_Exon 12- F     | ctctgcgctctgatcttc           |
| INSR_Exon 12- R     | cttggtcagccttgatgcc          |
| INSR_Exon 13- F     | atggacaggtggcagaagtg         |
| INSR_Exon 13- R     | aaggggcatgctgaagtg           |
| INSR_Exon 14- F     | acactcccagatgtgcaaag         |
| INSR_Exon 14- R     | taagcacagccccagtcag          |
| INSR_Exon 15- F     | ggagtggatgtgattttgatg        |
| INSR_Exon 15- R     | gcatgtttccccagag             |
| INSR_Exon 16- F     | gccttggggagtcttgtatg         |
| INSR_Exon 16- R     | gaaggcaaggaagctgatg          |
| INSR_Exon 17- F     | agtgttttcagggggtttg          |
| INSR_Exon 17- R     | aggaggcagagaaaggaag          |
| INSR_Exons 18&19- F | gaggagaaccctggtgagtc         |
| INSR_Exons 18&19- R | caacttcttctgaaatcaaacc       |
| INSR_Exon 20- F     | tgctaggaccaaggctgaag         |
| INSR_Exon 20- R     | cgctcttggctctcactagc         |
| INSR_Exon 21- F     | tgtgttggcatgtgtttg           |
| INSR_Exon 21- R     | acccttcaacgaacacctc          |
| INSR_Exon 22-1- F   | cagactcaccaggacgtg           |
| INSR_Exon 22-1- R   | <b>TGGACATGGTAGAGTCGTGAG</b> |
| INSR_Exon 22-2- F   | <b>CCTTCCTAACAGTGCCTACCG</b> |
| INSR_Exon 22-2- R   | tgaaagcagcagctattggtc        |

**Table 3: Primers designed to amplify *INSR* cDNA in 9 overlapping fragments**

| Fragment           | Sequence               |
|--------------------|------------------------|
| HIR1_F (INSR cDNA) | TGCGCACACGAGAAGGAC     |
| HIR1_R (INSR cDNA) | TGACCAGCGCGTAGTTAAAG   |
| HIR2_F (INSR cDNA) | CCCGAAGATTTCCGAGACC    |
| HIR2_R (INSR cDNA) | TGCAGCCGTGTGACTTACAG   |
| HIR3_F (INSR cDNA) | TCGAACGATGTTGGACTCATAG |
| HIR3_R (INSR cDNA) | GATTGTTGCCTCCTCGAATG   |
| HIR4_F (INSR cDNA) | AAGACCATCGACTCGGTGAC   |
| HIR4_R (INSR cDNA) | TCGAACTCCGTCACATTCTG   |
| HIR5_F (INSR cDNA) | ACATTCGGACATCTTTTGAC   |
| HIR5_R (INSR cDNA) | GGCCGAATCCTCATACTCAC   |
| HIR6_F (INSR cDNA) | ATTGCCTCAAAGGGCTGAAG   |
| HIR6_R (INSR cDNA) | GCCACATCAAGTGGACGAC    |
| HIR7_F (INSR cDNA) | CTGAAGCCAAGGCTGATGAC   |
| HIR7_R (INSR cDNA) | GCATGGAAACACATCACTGG   |
| HIR8_F (INSR cDNA) | GAGAAAGAGGCAGCCAGATG   |
| HIR8_R (INSR cDNA) | CCAAAGTCTCCAATTTTGACAG |
| HIR9_F (INSR cDNA) | GGTCGCCCATGATTTTACTG   |
| HIR9_R (INSR cDNA) | AGAATCCGCCCGTTTTTC     |

**Table 4: Primers for *CHN2***

| Primer name     | SNP included             | Sequence             |
|-----------------|--------------------------|----------------------|
| CHN2_Intron 6F  | rs3750103                | GGTGAAGGTGGGTGTCAAAG |
| CHN2_Intron 7R  |                          | TCCACCTGCCCTTTTGTAAC |
| CHN2_Intron 12F | rs3750099 and rs34971642 | TGCAATTTCTGAACCAGAG  |
| CHN2_Exon 13R   |                          | TCTGCACAATCAGCTTTTGG |

Primer sequences for *CHN2* used to amplify regions of patient genomic DNA containing potentially informative single nucleotide polymorphisms. SNPs with a minor allele frequency of above 0.1 were selected for investigation using HapMap.

**Table 5: Primer sequences to amplify the entire genomic sequence of *JAZF1***

| <b>Primer name</b> | <b>Sequence</b>           |
|--------------------|---------------------------|
| JAZF1_Exon 1F-1    | GCAGGCCTAGCGAGATAAAG      |
| JAZF1_Exon 1R-1    | CCTGTCATGGTGCTACATCG      |
| JAZF1_Exon 1F-2    | AGCCCCTCCTCTCCTCAC        |
| JAZF1_Exon 1R-2    | ACCCGGGCCAACTAATCTC       |
| JAZF1_Exon 2F      | CTGCTTAGCCTCTGTTACTTTGTG  |
| JAZF1_Exon 2R      | TCAATAAGCAGCAGATATAAGGTTG |
| JAZF1_Exon3F       | CTATACATGGCCCAGGTTCC      |
| JAZF1_Exon3R       | GAGAAGGAGGAGAGGGGAGA      |
| JAZF1_Exon 4F      | GCTCCTGACAGTCCTTGAC       |
| JAZF1_Exon4R       | CCCTGTTTCCATGTGGTTATG     |
| JAZF1_Exon 5F-1    | GGTTTCCGAAGTTTGACAGG      |
| JAZF1_Exon 5R-1    | GGGAAATGTGCTGAAGAACC      |
| JAZF1_Exon 5F-2    | TTGCACATGTAATCATCATACCC   |
| JAZF1_Exon 5R-2    | GCAGGCACTCAATCAATGTG      |
| JAZF1_Exon 5F-3    | GCTGAAAATCTTGCCATCTG      |
| JAZF1_Exon 5R-3    | TTTCCAATGAGAATGCAGACC     |
| JAZF1_Exon 5F-4    | GACCCCTATTGCCTCTTCTTC     |
| JAZF1_Exon 5R-4    | GGAAATTTTTAGAGGGCAGTG     |
| JAZF1_Exon 5F-5    | GGATGACAGTTCTGTTTGTAGATG  |
| JAZF1_Exon 5R-5    | CAAAATATTCCCATCCTTACCTG   |
| JAZF1_Exon 5F-6    | TTCAATGCTTTCAAAGATAAATTCC |
| JAZF1_Exon 5R-6    | TTTCCATGGTAACTTGATACTGG   |

**Table 6: Primer sequences for *GHRHR***

| <b>primer name</b> | <b>SNP included</b> | <b>Sequence</b>          |
|--------------------|---------------------|--------------------------|
| GHRHR_Exon 2F      | rs4988496           | ACAAGCAGCAGAGGAGATGC     |
| GHRHR_Exon 3R      |                     | GAGCTGAAGTGAGAGAAGAAATCC |
| GHRHR_Exon 6F      | rs740366            | CCGGAACACTACGTCCACACC    |
| GHRHR_Exon 6R      |                     | CTGCAGTGGTCAGTGTCGTC     |
| GHRHR_Exon 4F      | rs4988498           | GGCTGTGAAACGGGATTG       |
| GHRHR_Intron 4R    |                     | GCTCTCTGCTGGAAAACCTGC    |

Primer sequences for *GHRHR* used to amplify regions of patient genomic DNA containing potentially informative single nucleotide polymorphisms

**Table 7: Primer sequences for *GRB10***

| Primer Name | SNP included            | Sequence                |
|-------------|-------------------------|-------------------------|
| GRB10_Ex3F  | rs1800504               | TTTGGGTTTGATTGCTCTCC    |
| GRB10_Ex3R  |                         | CATCCTTGGAGAAGGCTCTG    |
| GRB10_Ex6F  | rs1800506 and rs1800505 | AGTTTCCTTCCTGACCTCATCTT |
| GRB10_Ex6R  |                         | TCTGATTCTCAAACCCATATGCT |
| GRB10_Ex11F | rs4947710               | TCTGCCTTATTTCCCTGCAT    |
| GRB10_Ex11R |                         | TTCCTCTGGGAGAAGACCAC    |
| GRB10_Ex15F | rs3807550               | CTGAGGTGGCAGCCTCTAAC    |
| GRB10_Ex15R |                         | AGTCTTCAGCCGAGAGGACA    |

Primer sequences for *GRB10* used to amplify regions of patient genomic DNA containing potentially informative single nucleotide polymorphisms

### Adipose Tissue Biopsies

Adipose tissue biopsies of subcutaneous adipose tissue were taken under local anaesthesia (1% lignocaine) using a 12-gauge needle under aseptic conditions. The biopsies were then washed and placed in pre-weighed eppendorfs containing trizol (Invitrogen, Paisley, UK) and homogenised in an automated homogeniser (Retsch-MM301) prior to storage in a -80 freezer for analysis at a later date.

### RNA extraction, retro-transcription and gene expression studies

RNA extraction and DNase treatment was performed using the PureLink™ Micro-to-Midi Total RNA Purification System (Invitrogen, Paisley, UK). RNA samples were retro-transcribed to produce cDNA using a high capacity cDNA retrotranscription kit (Applied Biosystems, Warrington, Cheshire, UK) as per manufacturer's instructions.

**House keeping genes used for gene expression studies:** For a panel of healthy tissues three housekeeping genes were used these were *GAPDH* (Glyceraldehyde-3-phosphate dehydrogenase), *PPIA* (Peptidylpropyl-isomeraseA gene) and *18S*. Similarly for adipose tissue the three housekeeping genes used were *18S*, *UBC* (Ubiquitin C) and *PPIA* and for EBV transformed lymphocytes the housekeeping genes used were *GAPDH*, *PPIA* and *18S*.

**Probes used for gene expression studies:** All probes used were inventoried assays on demand ordered from the Applied Biosystems website unless specifically stated otherwise. For *GRB10* expression the probe Hs00959293\_m1 was used. For *JAZF1* expression the probe Hs00697776\_m1 was used and for *GHRHR* the probe Hs00173457\_m1 was used.

For *CHN2* expression we identified all transcripts likely to be affected by the break point. Three transcripts (EU732751.1, EU732752.1, EU732753.1) are covered by an inventoried probe Hs00906969\_m1. One transcript (BQ446523.1) was discarded as it is not listed in UCSC genome browser as a human aligned mRNA and also neither its entire sequence nor any part of it match a sequence within the *CHN2* genomic sequence. We designed two assays to target the exon-exon boundary

between exons 5-6 and 9-10 to cover the AK124021 and EU732750.1.1 transcripts respectively (details available on request).

For *INSR* gene expression studies the probe Hs00961561\_m1 was selected. This covers all known transcripts and targets exons 9-10 i.e. upstream of the breakpoint. .

## References

1. Hannon TS, Janosky J, Arslanian SA. Longitudinal study of physiologic insulin resistance and metabolic changes of puberty. *Pediatr Res* 2006; **60**:759-763.
2. Acerini CL, Williams RM, Dunger DB. Metabolic impact of puberty on the course of type 1 diabetes. *Diabetes Metab* 2001; **27**:S19-25.
3. Ellard S, Thomas K, Edghill EL, Owens M, Ambye L, Cropper J, *et al.* Partial and whole gene deletion mutations of the GCK and HNF1A genes in maturity-onset diabetes of the young. *Diabetologia* 2007; **50**:2313-2317.
4. Lai KK, Lo IF, Tong TM, Cheng LY, Lam ST. Detecting exon deletions and duplications of the DMD gene using Multiplex Ligation-dependent Probe Amplification (MLPA). *Clin Biochem* 2006; **39**:367-372.

## Online Supplementary Results

Suliman et al

Figure 1: *JAZF1* expression was not altered in EBV-transformed lymphocyte patient cell line derived cDNA compared to a healthy male control.

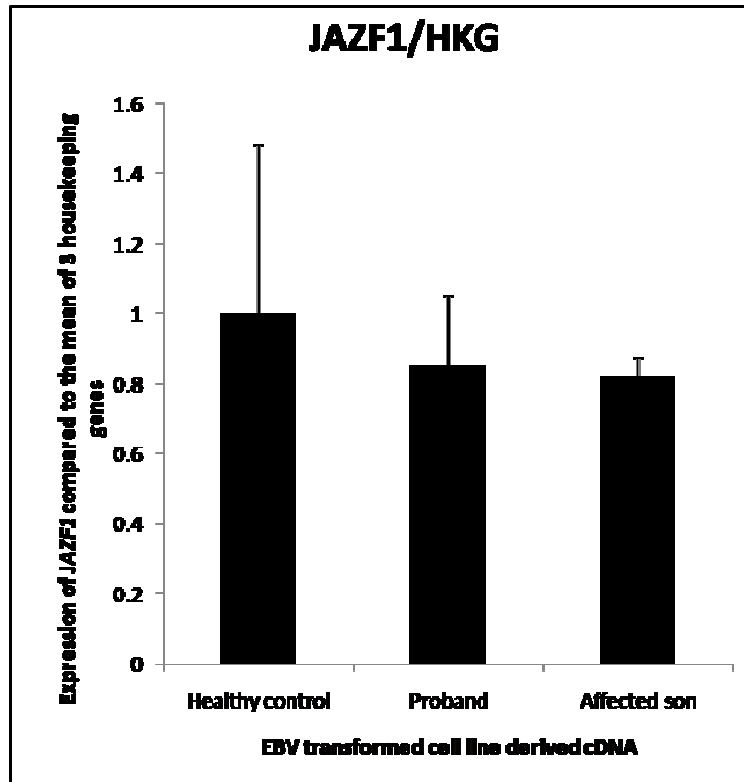

*JAZF1* gene expression relative to three housekeeping genes (HKG) (*GAPDH*, *PPIA* and *18S*) was not altered between patients and healthy control. The results are further normalised to the healthy control sample. Error bars reflect the 95% confidence intervals.



**Figure 2:** *GRB10* expression was not altered in patient adipose tissue derived cDNA compared to the mean of healthy control adipose tissue (n=3).

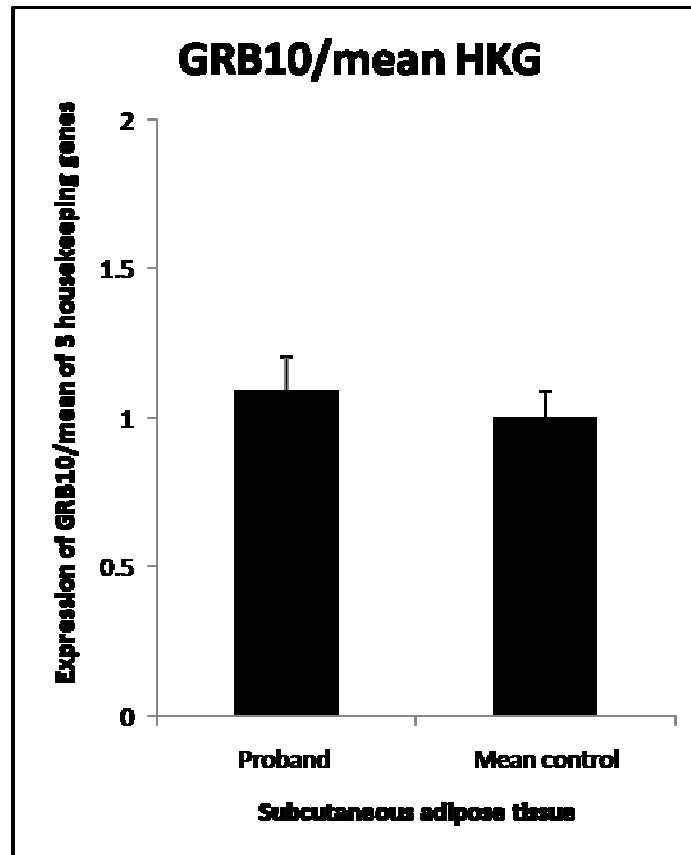

*GRB10* gene expression relative to three housekeeping genes (HKG) (*UBC*, *PPIA* and *18S*) was not altered between patient adipose tissue (AT) and adipose tissue from healthy controls. Results were normalised to those of 3 matched healthy controls. The error bars reflect the 95% confidence intervals.

**Table 1: Results of a GHRH-Arginine stimulation test performed on the proband showing a normal response (GH peak response >10ng/ml)**

| <b>Time (Min)</b> | <b>IGF-1 (ng/ml)</b> | <b>hGH (ng/ml)</b> | <b>hGH (mIU/L)</b> |
|-------------------|----------------------|--------------------|--------------------|
| <b>0´</b>         | 314.0 (117-329)      | 0.08               | 0.192              |
| <b>15´</b>        |                      | 2.6                | 6.24               |
| <b>30´</b>        |                      | 17.3               | 41.52              |
| <b>45´</b>        |                      | 26.8               | 64.32              |
| <b>60´</b>        |                      | 24.7               | 59.28              |
| <b>75´</b>        |                      | 18                 | 43.2               |
| <b>90´</b>        |                      | 10.3               | 24.72              |
| <b>105´</b>       |                      | 4.8                | 11.52              |
| <b>120´</b>       |                      | 2.4                | 5.76               |

A growth hormone-releasing hormone (GHRH)-Arginine stimulation test (details available on request) was performed on the proband to exclude a defect in the Growth Hormone Releasing Hormone Receptor as the gene encoding GHRHR is adjacent to the breakpoint on chromosome 7. This showed a normal growth hormone response with a peak GH response above 10ng/ml, thereby excluding a defect in GHRHR as the cause of the pre- and post- natal growth retardation.
